# Supplementary material for: In Vitro Synergism of Azithromycin Combination with Antibiotics against OXA-48-Producing Klebsiella pneumoniae Clinical Isolates
Source: MDPI journal article supplement (doi:10.3390/antibiotics10121551), 2021-12-17
Supplement: s1 [file s1]

## Supplementary Materials

**Table S1.** The synergistic activity of azithromycin in combination with colistin against additionally 26 carbapenemase-producing *K. pneumoniae* isolates.

| Isolate | Carbapenemase | MIC (mg/L) |     |      |     | AZM + CT              |
|---------|---------------|------------|-----|------|-----|-----------------------|
|         |               | IPM        | MEM | CT   | AZM | FICI (Interpretation) |
| KP1     | NDM           | 32         | 64  | 1    | 64  | 0.38 (Syn)            |
| KP2     | NDM OXA-48    | 64         | 128 | 1    | 64  | 0.31 (Syn)            |
| KP3     | NDM OXA-48    | 128        | 128 | 1    | 32  | 0.38 (Syn)            |
| KP4     | NDM OXA-48    | 64         | 128 | 32   | 32  | 0.14 (Syn)            |
| KP5     | NDM           | 256        | 256 | 64   | 32  | 0.13 (Syn)            |
| KP6     | NDM OXA-48    | 128        | 128 | 0.5  | 64  | 0.50 (Syn)            |
| KP7     | NDM OXA-48    | >256       | 256 | 32   | 32  | 0.26 (Syn)            |
| KP8     | NDM           | 64         | 128 | 0.5  | 32  | 0.75 (N)              |
| KP9     | OXA-48        | 16         | 32  | 1    | 64  | 0.31 (Syn)            |
| KP10    | OXA-48        | 8          | 32  | 1    | 256 | 0.31 (Syn)            |
| KP11    | NDM           | 64         | 128 | 32   | 32  | 0.19 (Syn)            |
| KP12    | NDM           | 64         | 128 | 32   | 16  | 0.31 (Syn)            |
| KP13    | NDM           | 16         | 32  | 0.25 | 32  | 1.00 (N)              |
| KP14    | IMP           | 32         | 16  | 1    | 32  | 0.50 (Syn)            |
| KP15    | NDM           | 32         | 16  | 1    | 32  | 0.31 (Syn)            |
| KP16    | NDM OXA-48    | 32         | 128 | 0.5  | 128 | 0.50 (Syn)            |
| KP17    | NDM OXA-48    | 16         | 16  | 0.25 | 128 | 1.00 (N)              |
| KP18    | NDM OXA-48    | 4          | 8   | 0.25 | 256 | 1.00 (N)              |
| KP19    | NDM OXA-48    | 8          | 8   | 0.5  | 256 | 0.75 (N)              |
| KP20    | NDM           | 128        | 32  | 0.5  | 256 | 1.00 (N)              |
| KP21    | NDM           | 32         | 32  | 1    | 128 | 0.75 (N)              |
| KP22    | OXA-48 IMP    | 1          | 2   | 0.25 | 256 | 1.00 (N)              |
| KP23    | NDM OXA-48    | 64         | 128 | 0.25 | 64  | 0.75 (N)              |
| KP24    | NDM           | 16         | 16  | 0.5  | 64  | 0.50 (Syn)            |
| KP25    | NDM OXA-48    | 16         | 16  | 0.25 | 16  | 0.63 (N)              |
| KP26    | NDM OXA-48    | 64         | 128 | 0.5  | 64  | 0.56 (N)              |

IPM: Imipenem; MEM: Meropenem; CT: Colistin; AZM: Azithromycin, FICI: Fractional Inhibitory Concentration Index; Syn: Synergism; N: No interaction.

**Table S2.** Interpretation of antibiotic susceptibility by MIC breakpoints.

| Antibiotic    | MIC breakpoints (mg/L) |                   | Note                                                         |
|---------------|------------------------|-------------------|--------------------------------------------------------------|
|               | Susceptible ( $\leq$ ) | Resistant ( $>$ ) |                                                              |
| Imipenem      | 2                      | 4                 |                                                              |
| Meropenem     | 2                      | 8                 |                                                              |
| Ertapenem     | 0.5                    | 0.5               |                                                              |
| Ciprofloxacin | 0.25                   | 0.5               |                                                              |
| Colistin      | 2                      | 2                 |                                                              |
| Ceftriaxone   | 1                      | 2                 |                                                              |
| Fosfomycin    | 32                     | 32                | <i>E. coli</i> criteria                                      |
| Azithromycin  | 16                     |                   | <i>Salmonella</i> Typhi and <i>Shigella</i> species criteria |
| Amikacin      | 8                      | 8                 |                                                              |

**Table S3.** Oligonucleotide sequences of primers used in this study.

| Gene                             | Primer sequences                                           | PCR product size (bp) | Application   | Reference              |
|----------------------------------|------------------------------------------------------------|-----------------------|---------------|------------------------|
| <i>fosA</i>                      | F- ATCTGTGGGTCTGCCTGTCGT<br>R- ATGCCCCGCATAGGGCTTCT        | 271                   | PCR           | Lu et al. [47]         |
| <i>fosA3</i>                     | F- CGGAGCCTATCTCTCCTGTG<br>R- CCGTCAGGGTCGAGAAAATA         | 219                   | PCR           | Singkham-in et al. [9] |
| <i>fosA5</i>                     | F- GCGCCGAGCGTGGCGTTT<br>R- GCCATCGGGATCGAGGAA             | 283                   | PCR           | Singkham-in et al. [9] |
| <i>fosB</i>                      | F- AGGTGAGACCTCGGCCTATT<br>R- GAGGTTTAGCCTCTTTATAA-TAACTCA | 302                   | PCR           | Singkham-in et al. [9] |
| <i>fosC2</i>                     | F- GGGCATATCTGAGCTTGGAG<br>R- CAATTTATGGCCGTCAGGAT         | 212                   | PCR           | Singkham-in et al. [9] |
| <i>fosX</i>                      | F- GTTGCGTTTAAGGCAGGAAG<br>R- GGCTCCATTTGTTGGACAGT         | 425                   | PCR           | Singkham-in et al. [9] |
| <i>ermA</i>                      | F- ACGATATTCACGTTTACCCACTTA<br>R- AACCAGAAAAACCCTAAAGACACG | 610                   | PCR           | Khan et al. [44]       |
| <i>ermB</i>                      | F- GAAAAGGTACTCAACCAAATA<br>R- AGTAACGGTACTTAAATTGTTTAC    | 639                   | PCR           | Sutcliffe et al. [42]  |
| <i>ermC</i>                      | F- AGTACAGAGGTGTAATTTTCG<br>R- AATTCCTGCATGTTTTAAGG        | 520                   | PCR           | Khan et al. [44]       |
| <i>ermF</i>                      | F- CGGGTCAGCACTTTACTATTG<br>R- GGACCTACCTACCTCATAGACAAG    | 468                   | PCR           | Roberts et al. [43]    |
| <i>bla<sub>OXA-48-like</sub></i> | F- GCGTGTTAAGGATGAACAC<br>R- CATCAAGTTCAACCCAACCG          | 438                   | PCR / RT-qPCR | Poirel et al. [40]     |
| <i>ompK35</i>                    | F- GTCGAAGCGGCAACCGATTATG<br>R- GCTTCGGCTTTGTCGCCATT       | 320                   | RT-qPCR       | Hamzaoui et al. [48]   |
| <i>ompK36</i>                    | F- GAGTTGCGTTGTAGGTCTGG<br>R- GGCGACACCTACGGTTCTGACAA      | 393                   | RT-qPCR       | Hamzaoui et al. [48]   |
| <i>16S rRNA</i>                  | F- GGAGGAAGGTGGGGATGACG<br>R- ATGGTGTGACGGGCGGTGTG         | 241                   | RT-qPCR       | Hou et al. [49]        |
